# Supplementary material for: Cross-neutralization of a SARS-CoV-2 antibody to a functionally conserved site is mediated by avidity
Source: PubMed Central journal article supplement (PMC7418720; doi:10.1101/2020.08.02.233536), 2020-08-03
Supplement: NIHPP2020.08.02.233536-supplement-1.pdf [file NIHPP2020.08.02.233536-supplement-1.pdf]

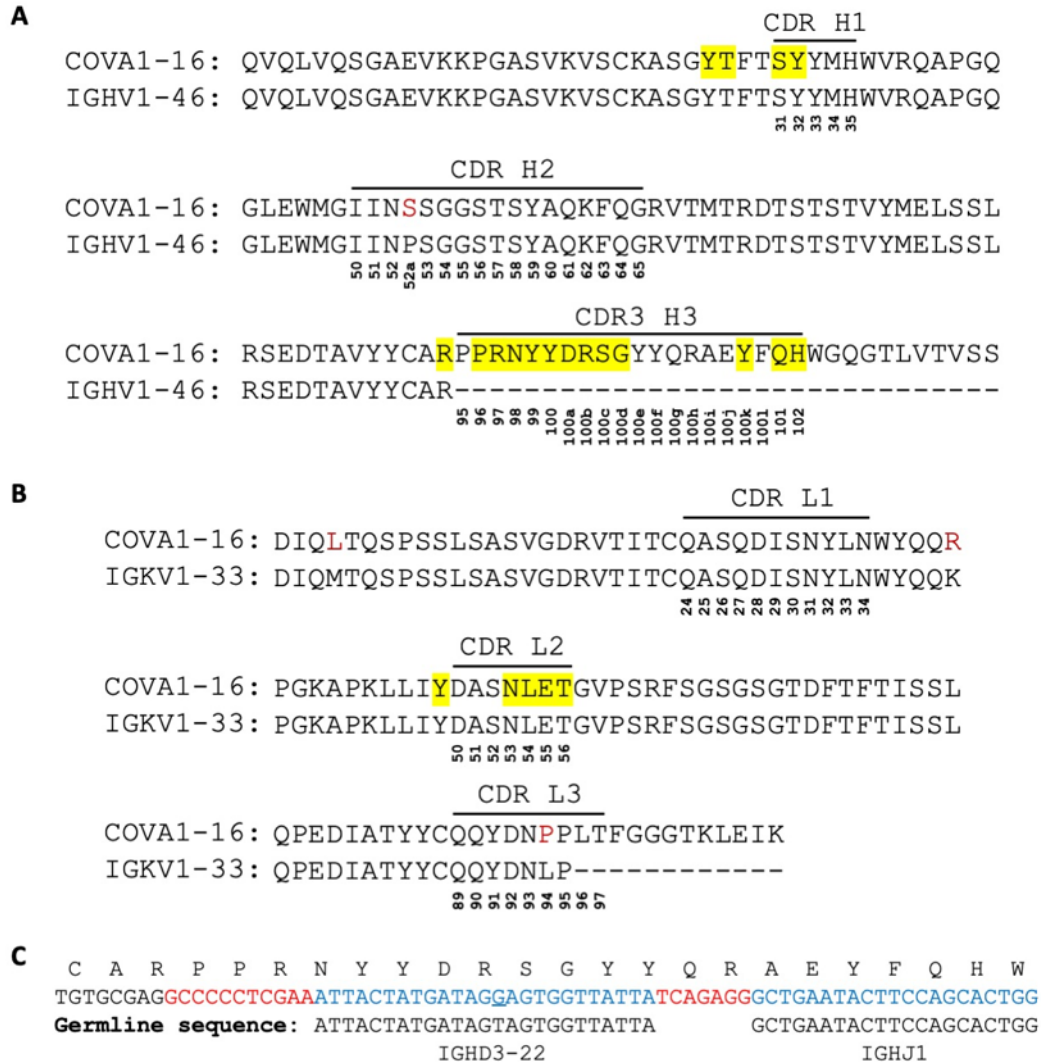

Total gene-derived nucleotides: 46

Total non-gene-derived nucleotides: 18

1

2 **Supplementary Figure 1. Comparison of COVA1-16 and putative germline**

3 **sequences.** Alignment of COVA1-16 Fab amino-acid sequence with (A) germline IGHV1-

4 46 sequence, and (B) germline IGKV1-33 sequence. The regions that correspond to CDR

5 H1, H2, H3, L1, L2, and L3 are indicated. Residues that differ from germline are highlighted

6 in red. COVA1-16 Fab residues that interact with the RBD are highlighted in yellow.

7 Residue positions in the CDRs are labeled according to the Kabat numbering scheme. (C)

8 Amino acid and nucleotide sequences of the V-D-J junction of COVA1-16, with putative

9 gene segments (blue) and N-regions (red), are indicate. The germline sequences of  
10 IGHD3-22 and IGHJ1 are also shown. The only somatically mutated nucleotide in the D  
11 region is underlined.

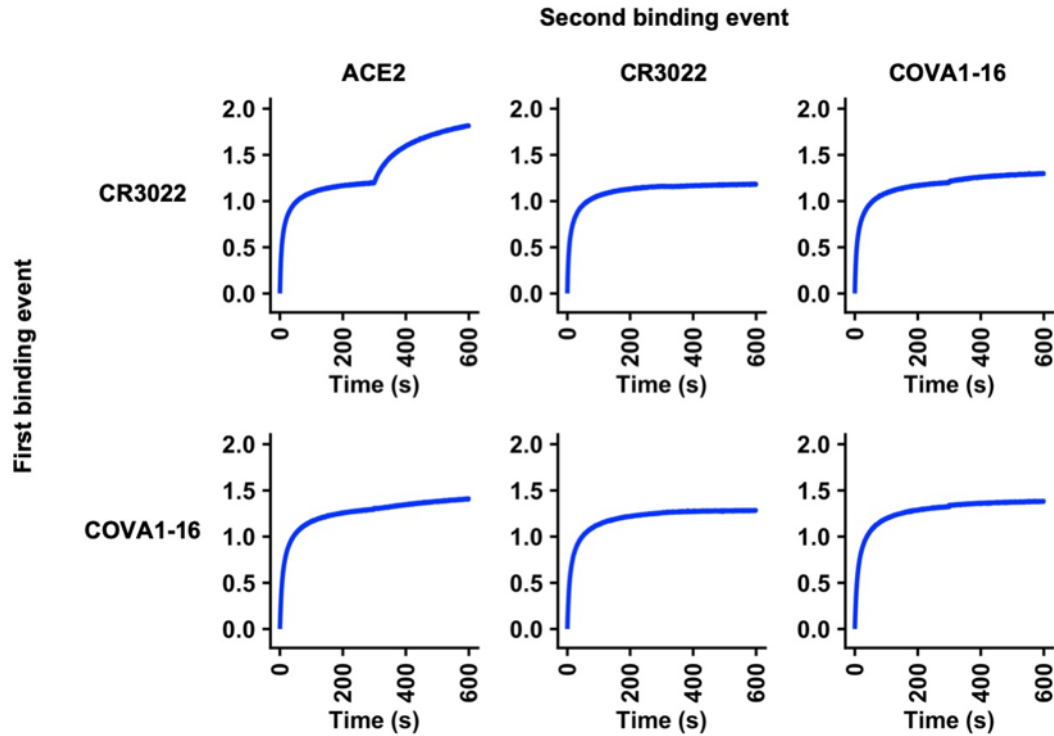

12

13 **Supplementary Figure 2. Competition assay between different IgGs and ACE2.**

14 Competition between COVA1-16 IgG, CR3022 IgG, and Fc-tagged ACE2 was measured  
15 by biolayer interferometry (BLI). Y-axis represents the response. The biosensor was first  
16 loaded with SARS-CoV-2 RBD, followed by two binding events: 1) CR3022 IgG or  
17 COVA1-16 IgG, and 2) ACE2, CR3022 IgG, or COVA1-16 IgG. A period of 300 s was  
18 used for each binding event. A further increase in signal during the second binding event  
19 (starting at 300 s time point) indicates lack of competition with the first ligand.

20

21

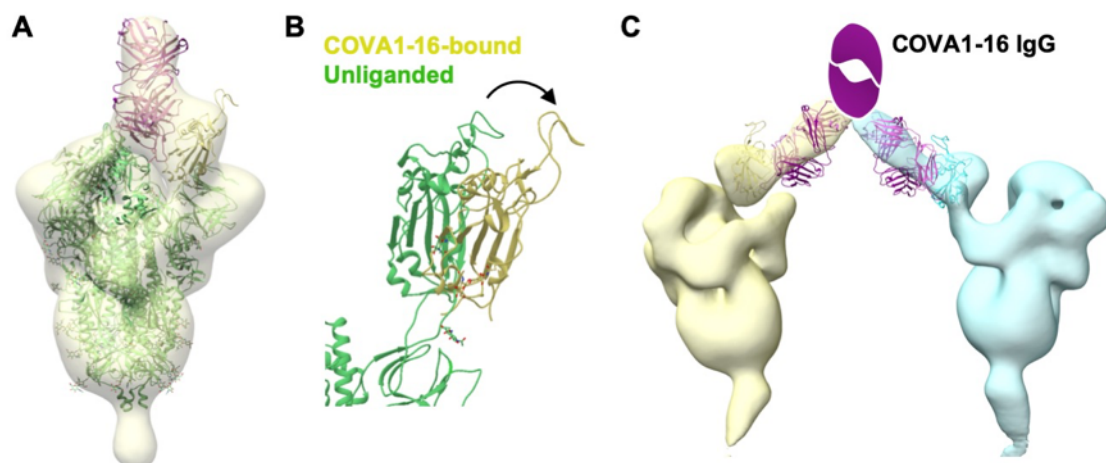

22

23 **Supplementary Figure 3. Negative-stain EM analysis of COVA1-16 binding to SARS-**

24 **CoV-2 S trimer. (A)** An atomic model from the crystal structure of SARS-CoV-2 RBD

25 bound to COVA1-16 Fab was fit into the negative-stain EM reconstruction of the SARS-

26 CoV-2 spike bound to COVA1-16 Fab. The COVA1-16 Fab approaches the apex of the S

27 trimer in a perpendicular orientation. A secondary structure backbone representation of

28 the prefusion spike model (PDB: 6Z97, green) [1] was also fit into the EM density with

29 RBD residues (334-528) removed from one of the protomers here for clarity. The COVA1-

30 16 heavy and light chains are in magenta and pink, respectively, and COVA1-16-bound

31 RBD in yellow. **(B)** Conformation of RBD in an up conformation from an unliganded SARS-

32 CoV-2 S trimer (PDB: 6Z97, green) [1] is compared to that of the RBD (yellow) bound by

33 COVA1-16 Fab. The arrow indicates that the RBD further rotates and opens up when

34 bound to COVA1-16, thereby moving further away from the trimer threefold axis. **(C)** An

35 atomic model of the spike RBD bound to COVA1-16 Fab is fit into a negative-stain EM

36 reconstruction, where COVA1-16 Fab approaches the SARS-CoV-2 S trimer from the

37 side. COVA1-16 is modelled as an IgG to illustrate the feasibility of bivalent binding to

38 adjacent spike proteins on the virus surface. The Fab heavy and light chains are shown in

39 magenta and pink. A schematic representation of the Fc domain of the IgG is shown in

40 magenta. The RBD model and spike density for each trimer is shown in yellow and cyan.

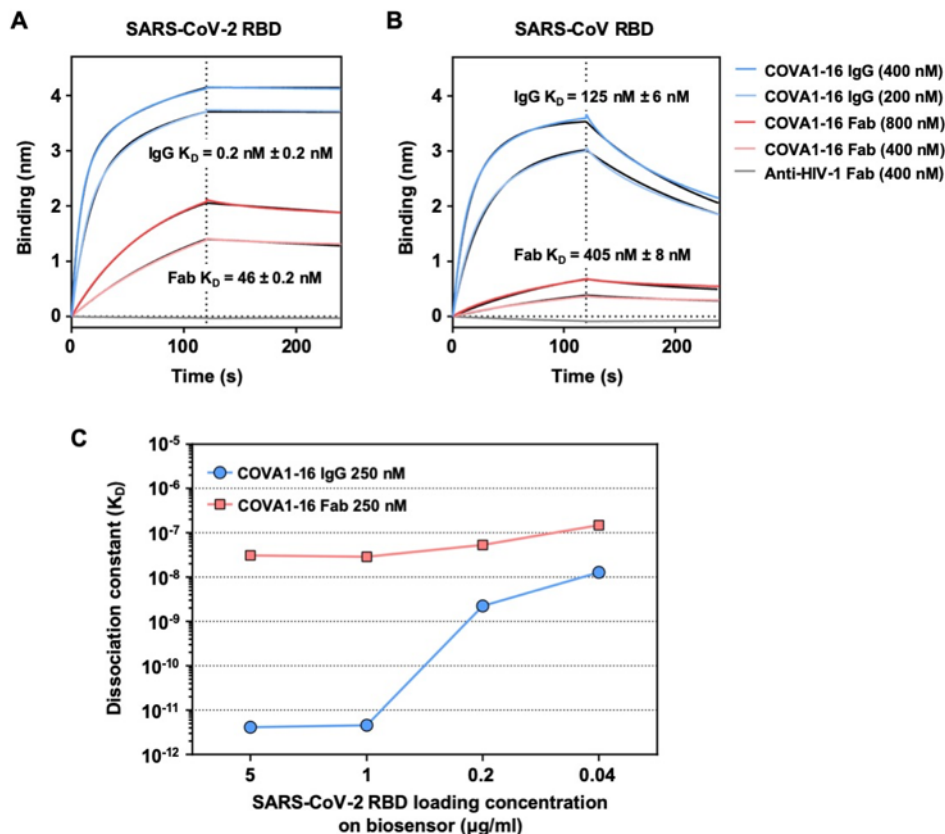

41

42 **Supplementary Figure 4. Sensorgrams for binding of COVA1-16 to SARS-CoV-2**

43 **RBD and SARS-CoV RBD. (A-B)** Binding kinetics of COVA1-16 Fab and IgG to (A)

44 SARS-CoV-2 RBD and (B) SARS-CoV RBD were measured by biolayer interferometry

45 (BLI) with RBD on the biosensor and antibody in solution. Y-axis represents the response.

46 An anti-HIV His-tagged Fab (4E1) was used as a negative control. Dissociation constants

47 ( $K_D$ ) for IgG and Fab were obtained using a 1:2 bivalent model and 1:1 binding model,

48 respectively, which are represented by the black lines. Representative results of two

49 replicates for each experiment are shown. (C) The relationship between SARS-CoV-2

50 RBD loading concentration on the biosensor and the dissociation constant of COVA1-16

51 IgG is shown.

52

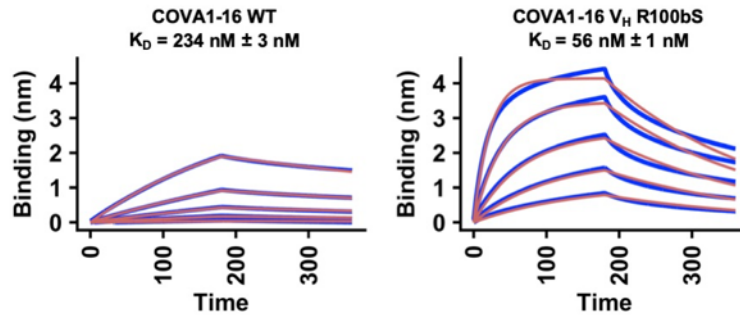

53

54 **Supplementary Figure 5. Sensorgrams for binding of COVA1-16 wild-type and V<sub>H</sub>**

55 **R100bS mutant Fabs to SARS-CoV-2 RBD.** Binding kinetics of COVA1-16 wild-type and

56 V<sub>H</sub> R100bS mutant Fab to SARS-CoV-2 RBD were measured by biolayer interferometry

57 (BLI) with RBD on the biosensor and antibody in solution. Y-axis represents the response.

58 Dissociation constants ( $K_D$ ) for Fabs were obtained using a 1:1 binding model, which are

59 represented by the red lines. Representative results of two replicates for each experiment

60 are shown. Unlike Figure S4, which used HEK293F-expressed SARS-CoV-2, the

61 experiment here used insect cell-expressed SARS-CoV-2.

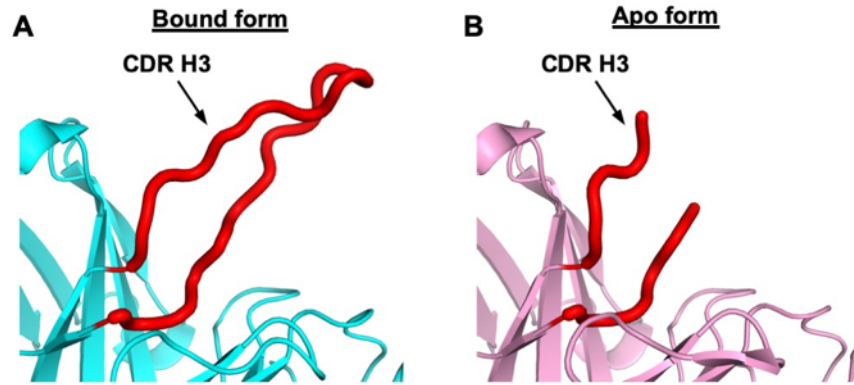

62

63 **Supplementary Figure 6. CDR H3 of COVA1-16 Fab is disordered in its unliganded**

64 **apo form. (A)** In the crystal structure of the RBD-bound form of COVA1-16 Fab, the

65 CDR H3 loop is completely ordered (red). **(B)** In the crystal structure of the apo form of

66 COVA1-16, the distal end of the CDR H3 loop is intrinsically disordered or flexible (red).





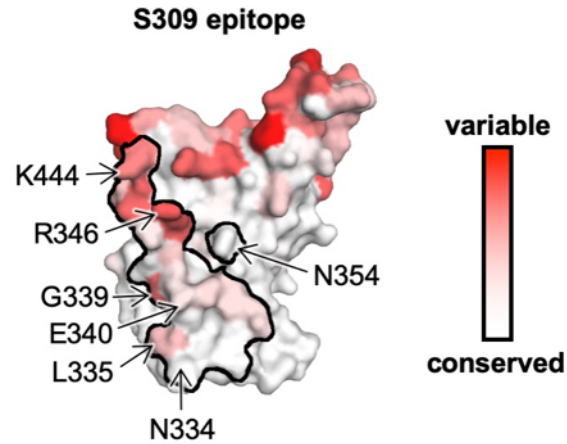

73

74 **Supplementary Figure 8. Sequence conservation of S309 epitope.** Sequence  
75 conservation of the RBD is highlighted on the structure for S309 epitope [2]. This view  
76 corresponds to the opposite side (rotated 180 degrees along the vertical axis) from that  
77 shown in Figure 4A-B.

78

## COVA1-16 epitope

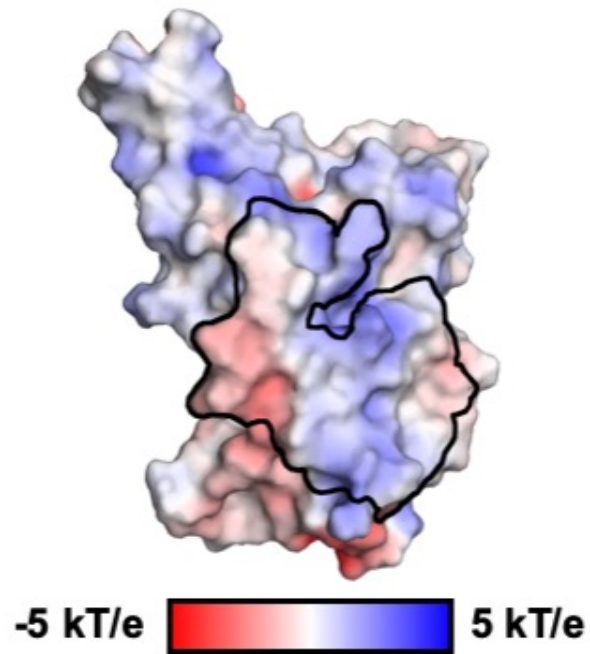

79

80 **Supplementary Figure 9. COVA1-16 epitope in electrostatic surface representation.**

81 The epitope of COVA1-16 is outlined and shows its largely polar nature.

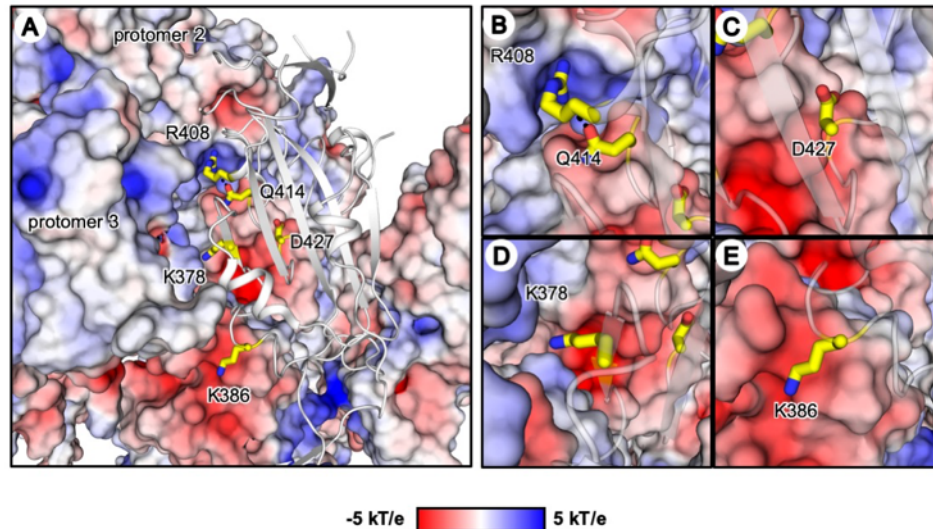

82

83 **Supplementary Figure 10. Location of residues of interest in the COVA1-16 epitope**

84 **when all three RBDs are in the “down” conformation. (A)** The RBD of one of the three

85 protomers is shown as a gray cartoon with the side chains of five residues of interest

86 shown in yellow stick representation. RBD residues K378, R408, Q414, and D427 are

87 within the COVA1-16 epitope, whereas K386 is not a COVA1-16 epitope residue. The

88 other two protomers (protomers 2 and 3) are shown in a surface electrostatic

89 representation. **(B-E)** Zoomed-in views for the regions surrounding residues **(B)** R408 and

90 Q414, **(C)** D427, **(D)** K378, and **(E)** K386. A hydrogen bond in **(B)** is represented by a

91 dashed line. Due to charge difference or similarity between the side chain and the proximal

92 region of the neighboring protomer, either repulsive (same charge) or attractive (opposite

93 charge) environments are found and visualized here. PDB 6VXX is used to represent the

94 spike protein [3]. Of note, the shape complementarity values ( $Sc$ ) [4] of the COVA1-16

95 epitope/RBD interface, COVA1-16 epitope/S2 interface, and COVA1-16 epitope/COVA1-

96 16 interface are 0.53, 0.75, and 0.74, respectively, indicating good complementary and

97 tight fit of the COVA1-16 epitope surface with the rest of the trimer in the RBD down

98 conformation. Sc values can range from 0 to 1, with a larger Sc value represents higher  
99 shape complementarity.  
100



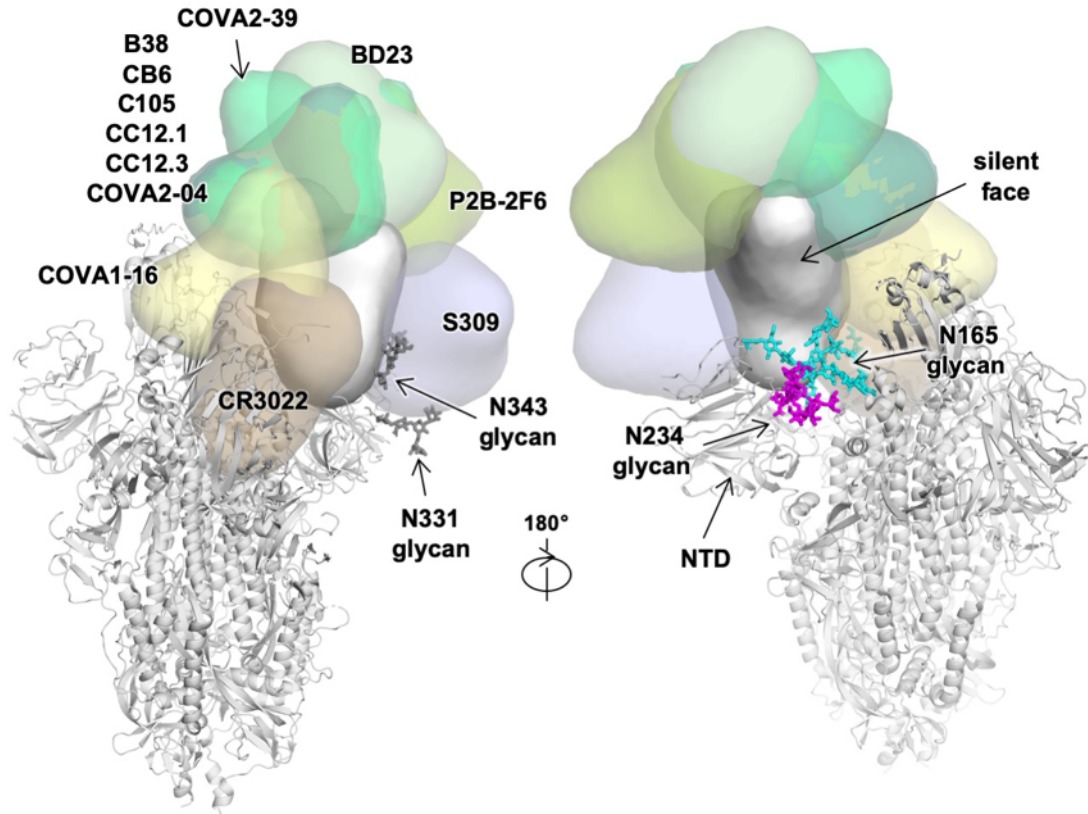

101

102 **Supplementary Figure 11. The N-glycan on the N-terminal domain (NTD) also**  
103 **shields part of the RBD.** The antibody-bound RBD, which is displayed and colored as in  
104 Figure 5, is shown in the up conformation on the S protein (PDB 6VSB) [5]. N-glycans on  
105 N165 (NTD), N234, N331, and N343 (RBD) are modelled according to the main glycoform  
106 observed at these sites in [6], and shown in stick representation. Antibody Fabs from  
107 published crystal and cryo-EM structures are represented as globular outlines in different  
108 colors as outlined in Figure 5. B38, CB6, C105, CC12.1, CC12.3, COVA2-04, COVA2-39,  
109 BD23, P2B-2F6 all bind at or around the receptor binding site. S309 binds to the elongated  
110 accessible face of the RBD in both up and down conformations, and CR3022 binds to the  
111 opposite face that is exposed in the RBD up conformation, but buried in the RBD down  
112 conformation.

113

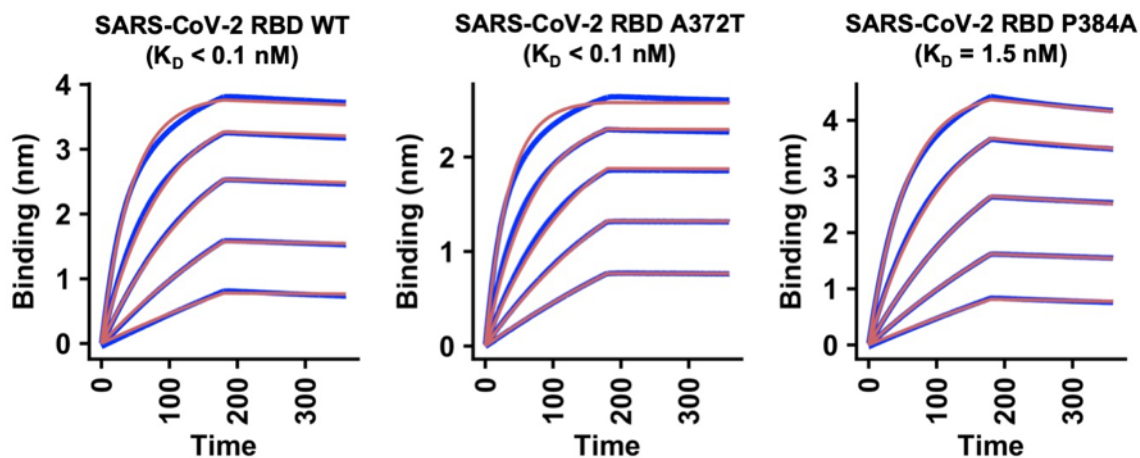

114

115 **Supplementary Figure 12. Sensorgrams for binding of COVA1-16 IgG to SARS-CoV-**  
116 **2 RBD WT or mutants.** Binding kinetics of COVA1-16 IgG to SARS-CoV-2 RBD WT,  
117 A372T, and P384A were measured by biolayer interferometry (BLI) with RBD on the  
118 biosensor and antibody in solution. Y-axis represents the response. Dissociation  
119 constants ( $K_D$ ) for Fabs were obtained using a 1:1 binding model, which are represented  
120 by the red lines. Representative results of two replicates for each experiment are shown.  
121 A372T and P384A are the only two mutations that differ between the SARS-CoV-2 and  
122 SARS-CoV sequences in COVA1-16 epitope. The affinity of COVA1-16 IgG to the A372T  
123 mutant did not show any detectable difference from WT. Although the affinity ( $K_D$ ) of  
124 COVA1-16 IgG to the P384A mutant decreases, the binding is still 100 times tighter than  
125 that measured between COVA1-16 IgG and SARS-CoV RBD (Figure S4B). As a result,  
126 the binding affinity of COVA1-16 to the RBD may be influenced by residues outside of the  
127 epitope as well as the dynamics of the RBD fluctuations between up and down  
128 conformations.

129  
130

## Supplementary Table 1. X-ray data collection and refinement statistics

| <b>Data collection</b>                          |                               |                             |
|-------------------------------------------------|-------------------------------|-----------------------------|
|                                                 | COVA1-16 Fab + SARS-CoV-2 RBD | COVA1-16 Fab                |
| Beamline                                        | SSRL 12-1                     | SSRL 12-1                   |
| Wavelength (Å)                                  | 0.97946                       | 0.97946                     |
| Space group                                     | <i>P</i> 1 2 <sub>1</sub> 1   | <i>P</i> 4 <sub>1</sub> 3 2 |
| Unit cell parameters                            |                               |                             |
| <i>a</i> , <i>b</i> , <i>c</i> (Å)              | 57.4, 124.9, 57.6             | 156.3, 156.3, 156.3         |
| $\alpha$ , $\beta$ , $\gamma$ (°)               | 90, 96.1, 90                  | 90, 90, 90                  |
| Resolution (Å) <sup>a</sup>                     | 50.0-2.89 (2.95-2.89)         | 50.0-2.53 (2.58-2.53)       |
| Unique reflections <sup>a</sup>                 | 17,656 (845)                  | 22,357 (1,084)              |
| Redundancy <sup>a</sup>                         | 3.7 (3.2)                     | 37.0 (14.1)                 |
| Completeness (%) <sup>a</sup>                   | 97.9 (93.9)                   | 100.0 (100.0)               |
| $\langle I/\sigma_I \rangle$ <sup>a</sup>       | 7.4 (1.2)                     | 21.5 (1.3)                  |
| $R_{\text{sym}}^b$ (%) <sup>a</sup>             | 15.3 (69.1)                   | 23.6 (>100)                 |
| $R_{\text{pim}}^b$ (%) <sup>a</sup>             | 9.0 (42.9)                    | 3.8 (54.3)                  |
| CC <sub>1/2</sub> <sup>c</sup> (%) <sup>a</sup> | 96.3 (66.8)                   | 99.6 (52.1)                 |
| <b>Refinement statistics</b>                    |                               |                             |
| Resolution (Å)                                  | 42.8-2.89                     | 34.1-2.53                   |
| Reflections (work)                              | 17,632                        | 21,872                      |
| Reflections (test)                              | 948                           | 1,069                       |
| $R_{\text{cryst}}^d / R_{\text{free}}^e$ (%)    | 23.7/29.4                     | 21.2/24.4                   |
| No. of atoms                                    | 4,873                         | 3,284                       |
| Macromolecules                                  | 4,845                         | 3,223                       |
| Glycans                                         | 28                            | -                           |
| Average <i>B</i> -values (Å <sup>2</sup> )      | 49                            | 43                          |
| Macromolecules                                  | 49                            | 43                          |
| Fab                                             | 45                            | 43                          |
| RBD                                             | 56                            | -                           |
| Glycans                                         | 89                            | -                           |
| Wilson <i>B</i> -value (Å <sup>2</sup> )        | 43                            | 40                          |
| <b>RMSD from ideal geometry</b>                 |                               |                             |
| Bond length (Å)                                 | 0.004                         | 0.007                       |
| Bond angle (°)                                  | 0.74                          | 1.02                        |
| <b>Ramachandran statistics (%)<sup>f</sup></b>  |                               |                             |
| Favored                                         | 95.9                          | 96.7                        |
| Outliers                                        | 0.16                          | 0.0                         |
| <b>PDB code</b>                                 |                               |                             |
|                                                 | pending                       | pending                     |

131  
132  
133  
134  
135  
136  
137  
138  
139

<sup>a</sup> Numbers in parentheses refer to the highest resolution shell.

<sup>b</sup>  $R_{\text{sym}} = \frac{\sum_{hkl} \sum_i |I_{hkl,i} - \langle I_{hkl} \rangle|}{\sum_{hkl} \sum_i I_{hkl,i}}$  and  $R_{\text{pim}} = \frac{\sum_{hkl} (1/(n-1))^{1/2} \sum_i |I_{hkl,i} - \langle I_{hkl} \rangle|}{\sum_{hkl} \sum_i I_{hkl,i}}$ , where  $I_{hkl,i}$  is the scaled intensity of the *i*<sup>th</sup> measurement of reflection *h*, *k*, *l*,  $\langle I_{hkl} \rangle$  is the average intensity for that reflection, and *n* is the redundancy.

<sup>c</sup> CC<sub>1/2</sub> = Pearson correlation coefficient between two random half datasets.

<sup>d</sup>  $R_{\text{cryst}} = \frac{\sum_{hkl} |F_o - F_c|}{\sum_{hkl} |F_o|} \times 100$ , where  $F_o$  and  $F_c$  are the observed and calculated structure factors, respectively.

<sup>e</sup>  $R_{\text{free}}$  was calculated as for  $R_{\text{cryst}}$ , but on a test set comprising 5% of the data excluded from refinement.

<sup>f</sup> From MolProbity [7].



140  
141  
142  
143

**Supplementary Table 2. Hydrogen bonds identified in the antibody-RBD interface using the PISA program**

| <b>COVA1-16 Fab</b> | <b>Distance [Å]</b> | <b>SARS-CoV-2 RBD</b> |
|---------------------|---------------------|-----------------------|
| H:ARG100b[NH2]      | 3.3                 | A:TYR369[O]           |
| H:ARG100b[NE]       | 3.9                 | A:SER371[O]           |
| H:ARG100b[N]        | 3.8                 | A:PHE377[O]           |
| H:TYR100[N]         | 2.6                 | A:CYS379[O]           |
| H:GLN101[NE2]       | 3.1                 | A:GLN414[OE1]         |
| H:ARG97[NH1]        | 2.5                 | A:ASP427[O]           |
| H:TYR32[OH]         | 3.1                 | A:ASP427[OD1]         |
| H:THR28[ N]         | 3.2                 | A:ASP427[OD2]         |
| H:ARG97[NH1]        | 3.0                 | A:PHE429[O]           |
| H:TYR100[O]         | 2.9                 | A:CYS379[N]           |
| H:SER100c[O]        | 3.3                 | A:THR385[OG1]         |
| H:GLN101[OE1]       | 3.8                 | A:GLN414[NE2]         |
| L:ASN53[OD1]        | 3.2                 | A:ARG408[NH2]         |
| L:LEU54[O]          | 3.7                 | A:ARG408[NE]          |

## 144 SUPPLEMENTARY REFERENCES

- 145 1. Huo J, Zhao Y, Ren J, Zhou D, Duyvesteyn HME, Ginn HM, et al. Neutralization  
146 of SARS-CoV-2 by destruction of the prefusion spike. *Cell Host Microbe*. 2020.  
147 Epub 2020/06/26. doi: 10.1016/j.chom.2020.06.010. PubMed PMID: 32585135;  
148 PubMed Central PMCID: PMC7303615.
- 149 2. Pinto D, Park YJ, Beltramello M, Walls AC, Tortorici MA, Bianchi S, et al. Cross-  
150 neutralization of SARS-CoV-2 by a human monoclonal SARS-CoV antibody.  
151 *Nature*. 2020. Epub 2020/05/19. doi: 10.1038/s41586-020-2349-y. PubMed  
152 PMID: 32422645.
- 153 3. Walls AC, Park YJ, Tortorici MA, Wall A, McGuire AT, Velesler D. Structure,  
154 function, and antigenicity of the SARS-CoV-2 spike glycoprotein. *Cell*.  
155 2020;181:281-92.e6. Epub 2020/03/11. doi: 10.1016/j.cell.2020.02.058. PubMed  
156 PMID: 32155444.
- 157 4. Lawrence MC, Colman PM. Shape complementarity at protein/protein interfaces.  
158 *J Mol Biol*. 1993;234(4):946-50. Epub 1993/12/20. doi: 10.1006/jmbi.1993.1648.  
159 PubMed PMID: 8263940.
- 160 5. Wrapp D, Wang N, Corbett KS, Goldsmith JA, Hsieh CL, Abiona O, et al. Cryo-  
161 EM structure of the 2019-nCoV spike in the prefusion conformation. *Science*.  
162 2020;367:1260-3. Epub 2020/02/23. doi: 10.1126/science.abb2507. PubMed  
163 PMID: 32075877.
- 164 6. Watanabe Y, Allen JD, Wrapp D, McLellan JS, Crispin M. Site-specific glycan  
165 analysis of the SARS-CoV-2 spike. *Science*. 2020;369:330-3. Epub 2020/05/06.  
166 doi: 10.1126/science.abb9983. PubMed PMID: 32366695; PubMed Central  
167 PMCID: PMC7199903.
- 168 7. Chen VB, Arendall WB, 3rd, Headd JJ, Keedy DA, Immormino RM, Kapral GJ, et  
169 al. MolProbity: all-atom structure validation for macromolecular crystallography.  
170 *Acta Crystallogr D Biol Crystallogr*. 2010;66(Pt 1):12-21. doi:  
171 10.1107/S0907444909042073. PubMed PMID: 20057044; PubMed Central  
172 PMCID: PMC7199903.  
173
